# Supplementary material for: Complexes of phosphine oxides with substituted phenols: hydrogen bond characterization based on shifts of PO stretching bands
Source: Royal Society of Chemistry journal article supplement (doi:10.1039/d3cp05817d), 2024-01-01
Supplement: d3cp05817d1.pdf [file d3cp05817d1.pdf]

*Supporting information for*

## **Complexes of phosphine oxides with substituted phenols: hydrogen bond characterization based on shifts of P=O stretching bands**

Mikhail A. Kostin,<sup>a</sup> Omar Alkhuder,<sup>a</sup> Luhang Xu,<sup>b</sup> Danil V. Krutin,<sup>a</sup> Ruslan E. Asfin <sup>\*b</sup> and Peter M. Tolstoy <sup>\*a</sup>

<sup>a</sup> *Institute of Chemistry, St. Petersburg State University, Russia*

<sup>b</sup> *Department of Physics, St. Petersburg State University, Russia*

\* – corresponding authors, [r.asfin@spbu.ru](mailto:r.asfin@spbu.ru), [peter.tolstoy@spbu.ru](mailto:peter.tolstoy@spbu.ru)

| <b>Content</b>  |                                                                                                                                                             | <b>Page</b>  |
|-----------------|-------------------------------------------------------------------------------------------------------------------------------------------------------------|--------------|
| <b>Fig. S1</b>  | IR spectrum of TPPO in CCl <sub>4</sub> solution ( $\nu_{\text{OH}}$ and $\nu_{\text{P=O}}$ bands)                                                          | <b>S2</b>    |
| <b>Fig. S2</b>  | IR spectrum of TBPO in CCl <sub>4</sub> solution ( $\nu_{\text{OH}}$ and $\nu_{\text{P=O}}$ bands)                                                          | <b>S2</b>    |
| <b>Fig. S3</b>  | IR spectrum of HMPA in CCl <sub>4</sub> solution ( $\nu_{\text{OH}}$ and $\nu_{\text{P=O}}$ bands)                                                          | <b>S3</b>    |
| <b>Table S1</b> | The $\nu_{\text{OH}}$ values for free proton donors <b>1–10</b> and $\nu_{\text{P=O}}$ values for free TPPO, TBPO and HMPA in CCl <sub>4</sub> solution     | <b>S3</b>    |
| <b>Fig. S4</b>  | IR spectra of TPPO complexes with proton donors <b>1–10</b> in CCl <sub>4</sub> solution                                                                    | <b>S4–S5</b> |
| <b>Fig. S5</b>  | IR spectra of TBPO complexes with proton donors <b>1–10</b> in CCl <sub>4</sub> solution                                                                    | <b>S6–S7</b> |
| <b>Fig. S6</b>  | IR spectra of HMPA complexes with proton donors <b>1–10</b> in CCl <sub>4</sub> solution                                                                    | <b>S8–S9</b> |
| <b>Fig. S7</b>  | Calculated optimized geometries of TPPO complexes with proton donors <b>1–10</b>                                                                            | <b>S10</b>   |
| <b>Table S2</b> | Calculated electronic, geometric and NMR parameters of TPPO complexes with proton donors <b>1–10</b>                                                        | <b>S10</b>   |
| <b>Fig. S8</b>  | IR spectra of TPPO, TBPO and HMPA in <i>n</i> -hexane solutions                                                                                             | <b>S11</b>   |
| <b>Fig. S9</b>  | IR spectra of TPPO complexes with phenols <b>5</b> and <b>7</b> in <i>n</i> -hexane solution                                                                | <b>S12</b>   |
| <b>Fig. S10</b> | IR spectra of TBPO complexes with phenols <b>5</b> and <b>7</b> in <i>n</i> -hexane solution                                                                | <b>S13</b>   |
| <b>Fig. S11</b> | IR spectra of HMPA complexes with phenols <b>5</b> and <b>7</b> in <i>n</i> -hexane solution                                                                | <b>S14</b>   |
| <b>Table S3</b> | The values of $R^2$ calculated for fitting functions $\Delta\nu_{\text{OH}}(\Delta\nu_{\text{P=O}})$                                                        | <b>S15</b>   |
| <b>Table S4</b> | The $\nu_{\text{OH}}$ values for free proton donors <b>1–10</b> in <i>n</i> -hexane solution                                                                | <b>S16</b>   |
| <b>Fig. S12</b> | Calculated geometries of free TPPO, phenol <b>6</b> and their complexes with CCl <sub>4</sub>                                                               | <b>S17</b>   |
| <b>Table S5</b> | The $\nu_{\text{OH}}$ and $\nu_{\text{P=O}}$ values for free TPPO, 4-nitrophenol and their complexes with and without additional CCl <sub>4</sub> molecules | <b>S17</b>   |

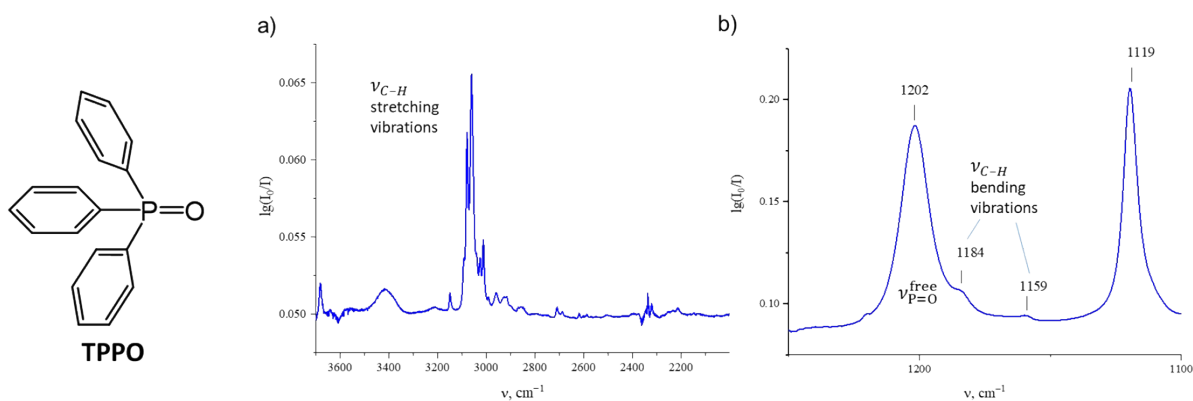

**Fig. S1.** Parts of IR spectra of  $\sim 3.9 \text{ mmol L}^{-1}$  solution of triphenylphosphine oxide (TPPO) in  $\text{CCl}_4$  at room temperature. Spectral regions containing (a) O–H stretching band ( $2000\text{--}3700 \text{ cm}^{-1}$ ) and (b) P=O stretching band ( $1100\text{--}1250 \text{ cm}^{-1}$ ) are shown. The P=O band for free TPPO,  $\nu_{\text{P}=\text{O}}^{\text{free}}$ , is located at  $1202 \text{ cm}^{-1}$ .

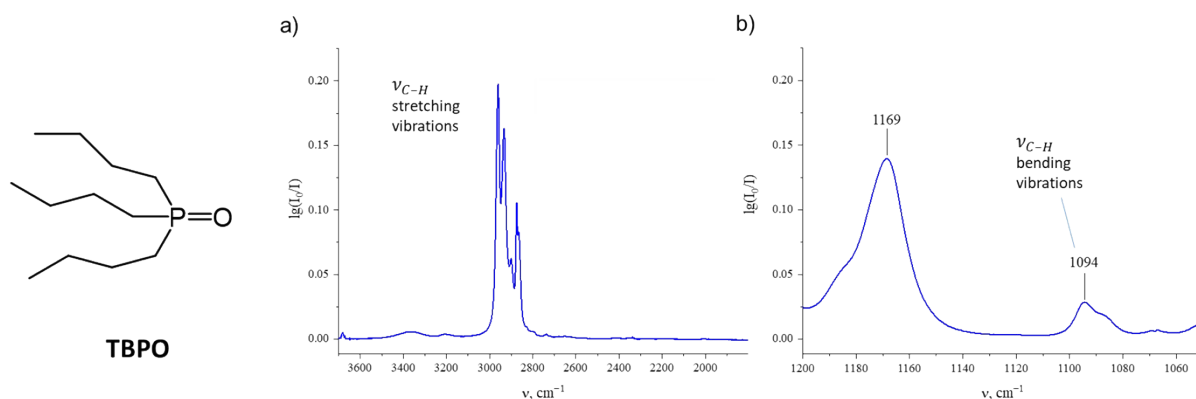

**Fig. S2.** Parts of IR spectra of  $\sim 4.7 \text{ mmol L}^{-1}$  solution of tributylphosphine oxide (TBPO) in  $\text{CCl}_4$  at room temperature. Spectral regions containing (a) O–H stretching band ( $2000\text{--}3700 \text{ cm}^{-1}$ ) and (b) P=O stretching band ( $1100\text{--}1250 \text{ cm}^{-1}$ ) are shown. The P=O band for free TBPO,  $\nu_{\text{P}=\text{O}}^{\text{free}}$ , is located at  $1169 \text{ cm}^{-1}$ .

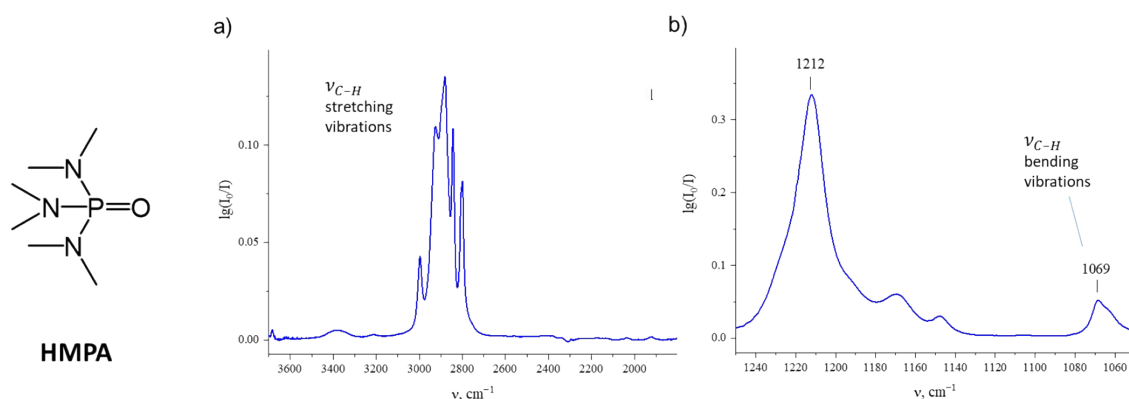

**Fig. S3.** Parts of IR spectra of  $\sim 5.8 \text{ mmol L}^{-1}$  solution of hexamethylphosphoramide (HMPA) in  $\text{CCl}_4$  at room temperature. Spectral regions containing (a) O–H stretching band ( $2000\text{--}3700 \text{ cm}^{-1}$ ) and (b) P=O stretching band ( $1100\text{--}1250 \text{ cm}^{-1}$ ) are shown. The P=O band for free HMPA,  $\nu_{P=O}^{free}$ , is located at  $1212 \text{ cm}^{-1}$ .

**Table S1.** The wavenumbers of absorption bands corresponding to stretching vibration of OH group,  $\nu_{OH}^{free}$ , and P=O group,  $\nu_{P=O}^{free}$ , of TPPO, TBPO, HMPA and proton donors **1–10** in solutions in  $\text{CCl}_4$  at room temperature.

| Compound    | The type of vibration              | The frequency of vibration, in $\text{cm}^{-1}$ |
|-------------|------------------------------------|-------------------------------------------------|
| <b>1</b>    | $\nu_{OH}^{free}$ ,<br>stretching  | 3557                                            |
| <b>2</b>    |                                    | 3611                                            |
| <b>3</b>    |                                    | 3613                                            |
| <b>4</b>    |                                    | 3609                                            |
| <b>5</b>    |                                    | 3606                                            |
| <b>6</b>    |                                    | 3594                                            |
| <b>7</b>    |                                    | 3529                                            |
| <b>8</b>    |                                    | 3516                                            |
| <b>9</b>    |                                    | 3519                                            |
| <b>10</b>   |                                    | 3619                                            |
| <b>TPPO</b> | $\nu_{P=O}^{free}$ ,<br>stretching | 1202                                            |
| <b>TBPO</b> |                                    | 1212                                            |
| <b>HMPA</b> |                                    | 1169                                            |

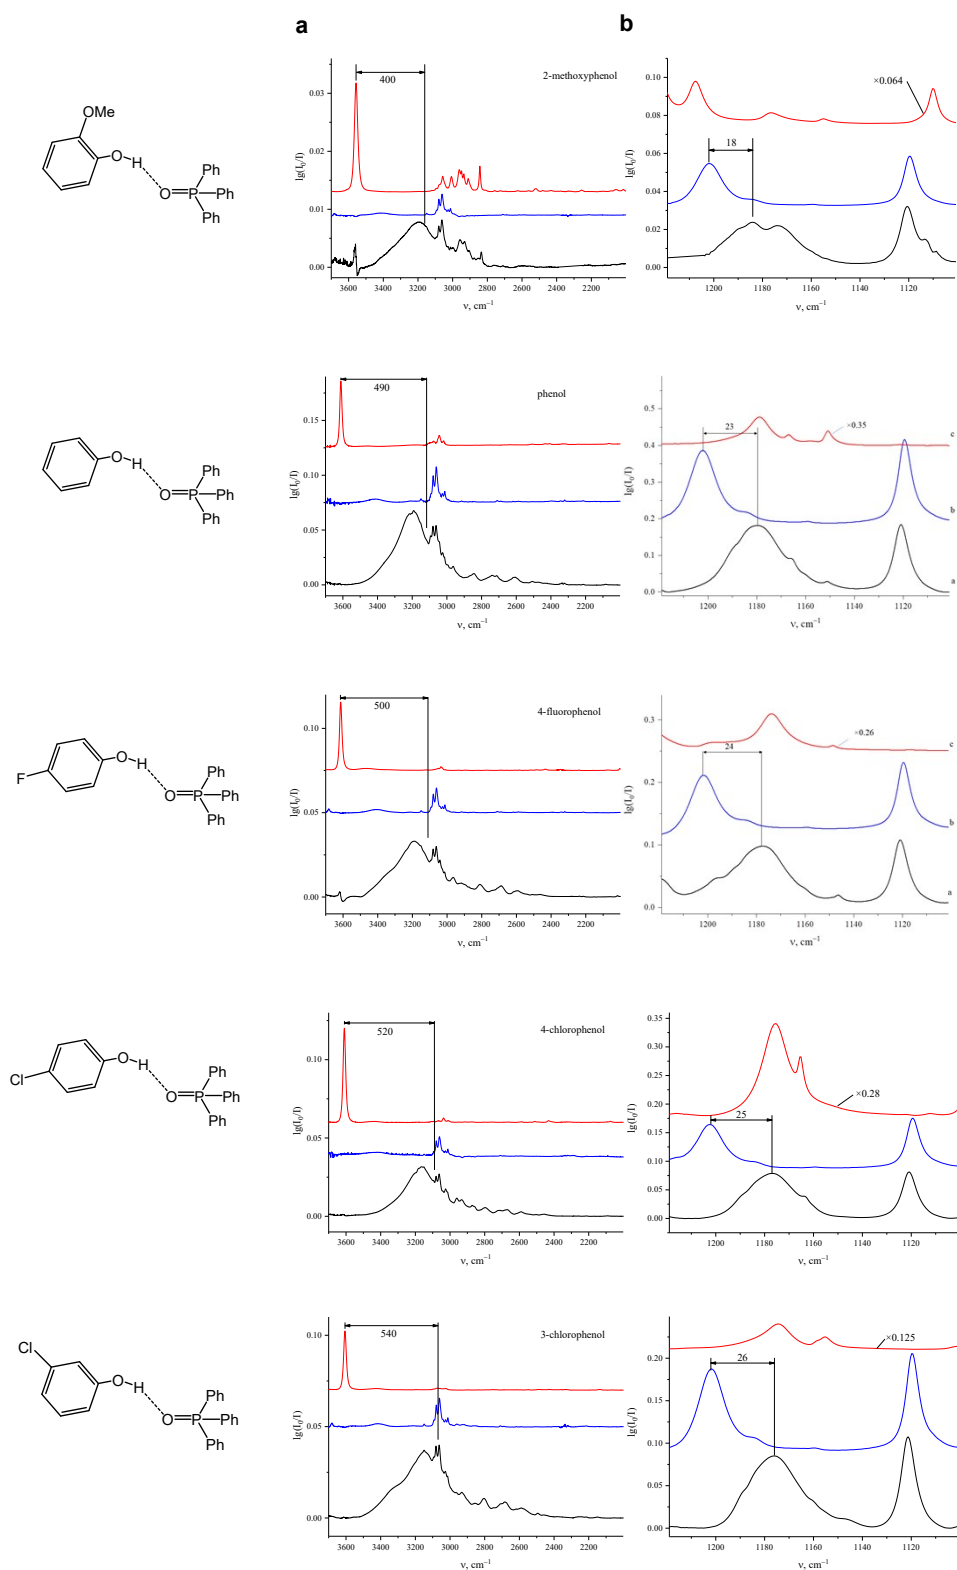

**Fig. S4.** Parts of IR spectra of complexes formed by TPPO and proton donors **1–10** in  $\text{CCl}_4$  solution at room temperature in the regions of (a) OH stretching vibrations (b) P=O stretching vibrations. The spectra of free proton donors (red) free TPPO (blue) and their complexes (black) are shown. Vertical bars indicate locations of OH and P=O vibrational bands for free species and the complexes.

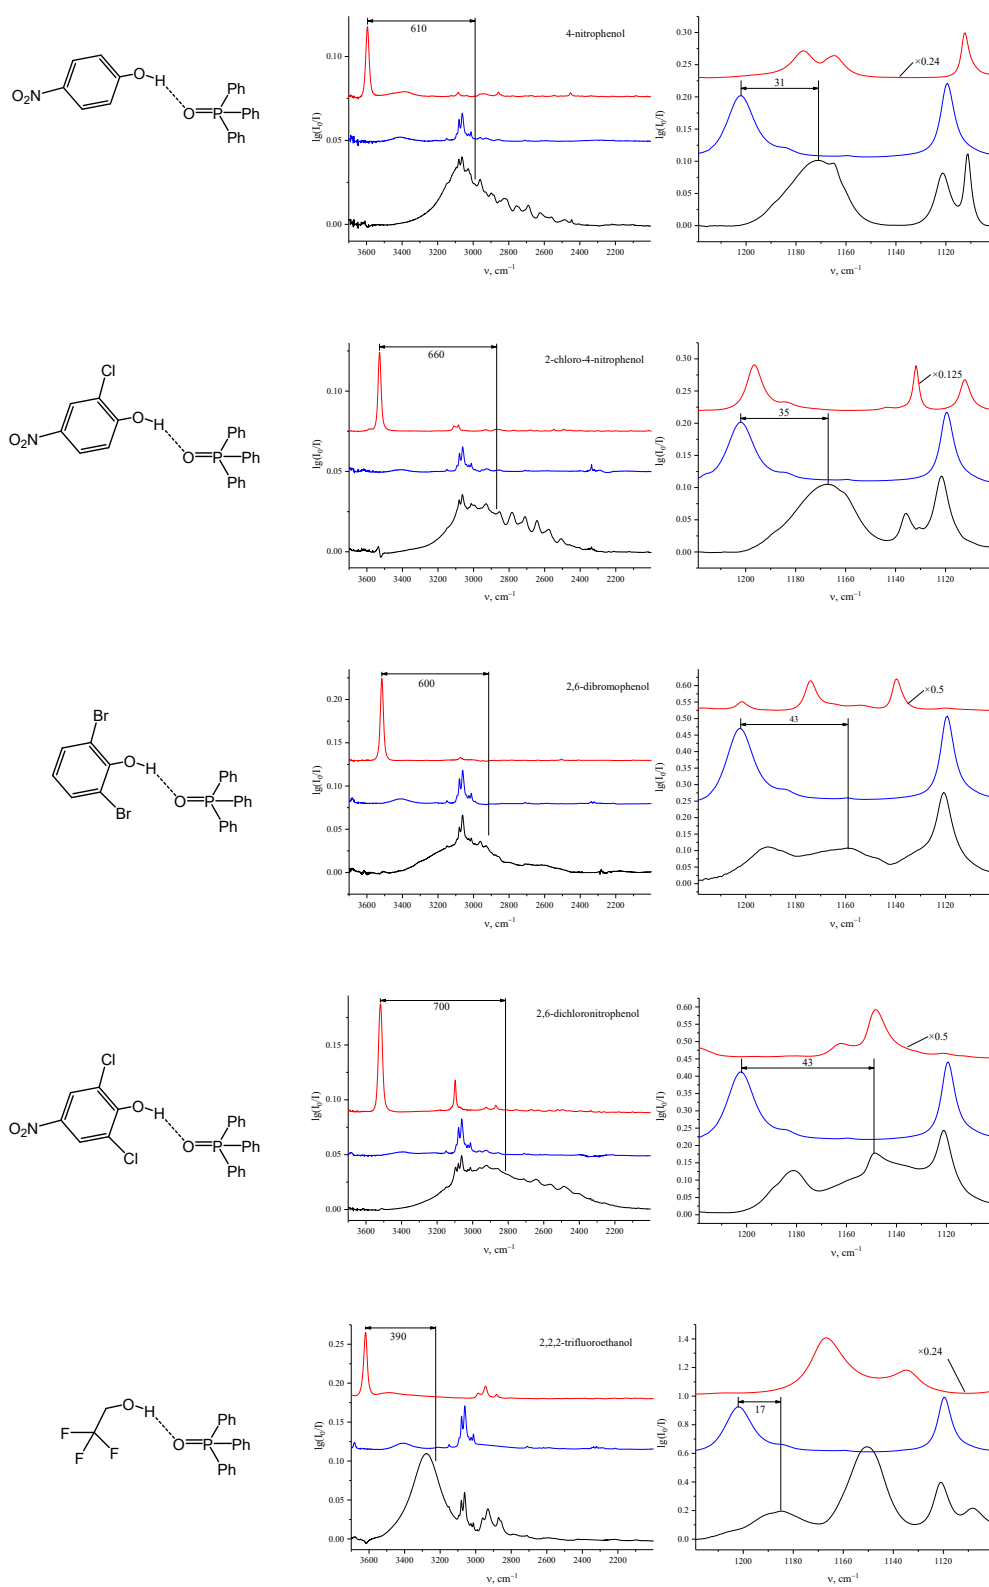

Fig. S4. (Continued)

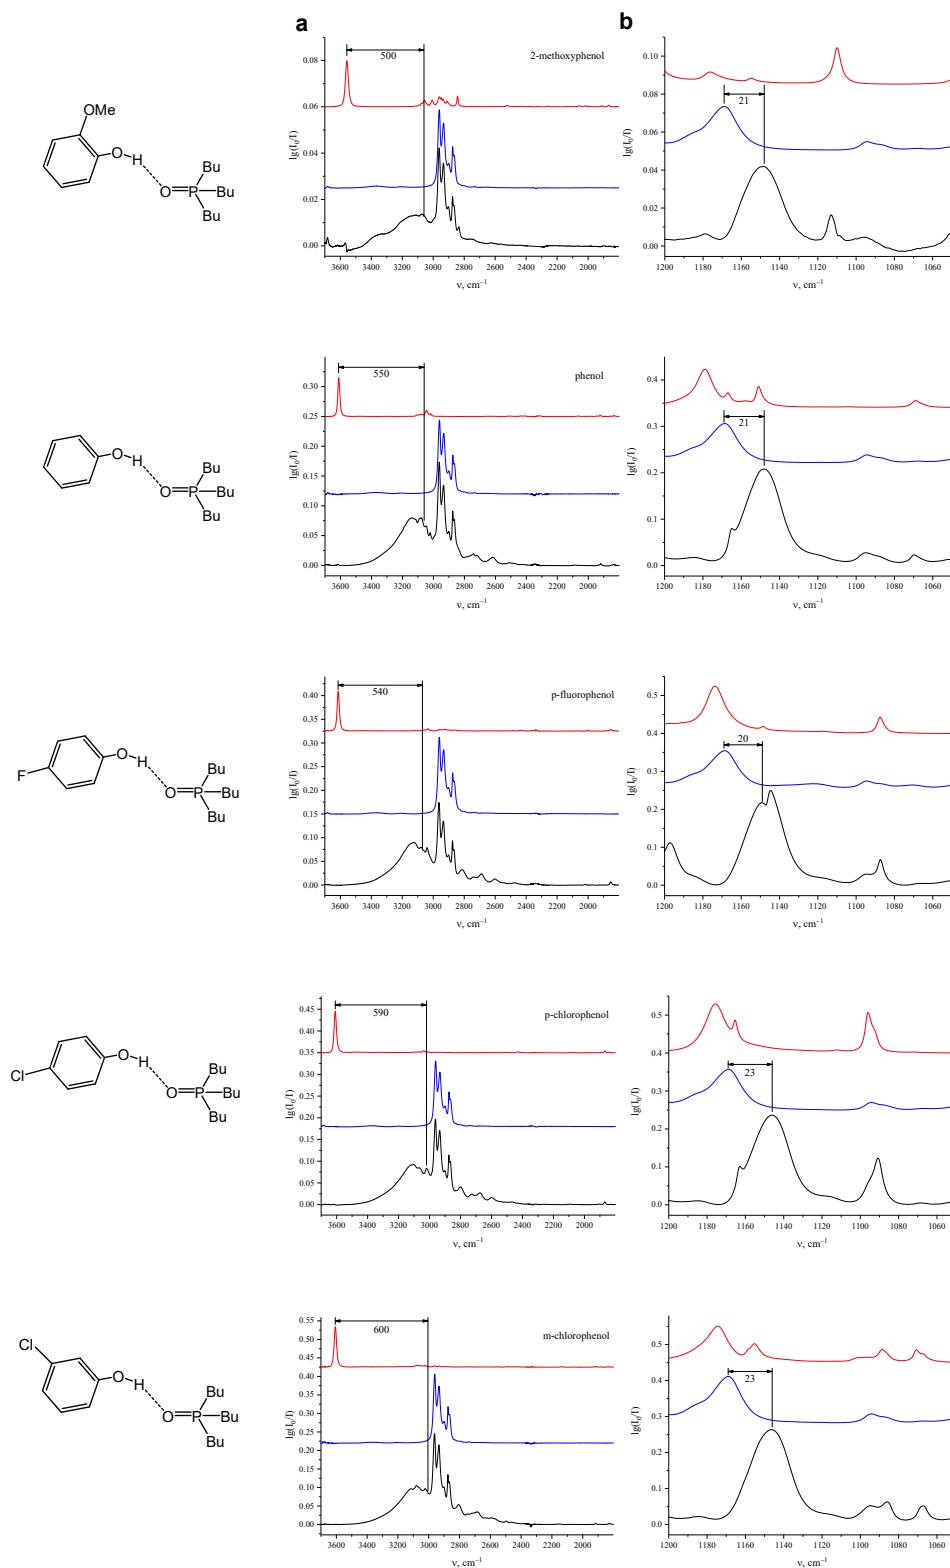

**Fig. S5.** Parts of IR spectra of complexes formed by TBPO and proton donors 1–10 in  $\text{CCl}_4$  solution at room temperature in the regions of (a) OH stretching vibrations (b) P=O stretching vibrations. The spectra of free proton donors (red) free TBPO (blue) and their complexes (black) are shown. Vertical bars indicate locations of OH and P=O vibrational bands for free species and the complexes.

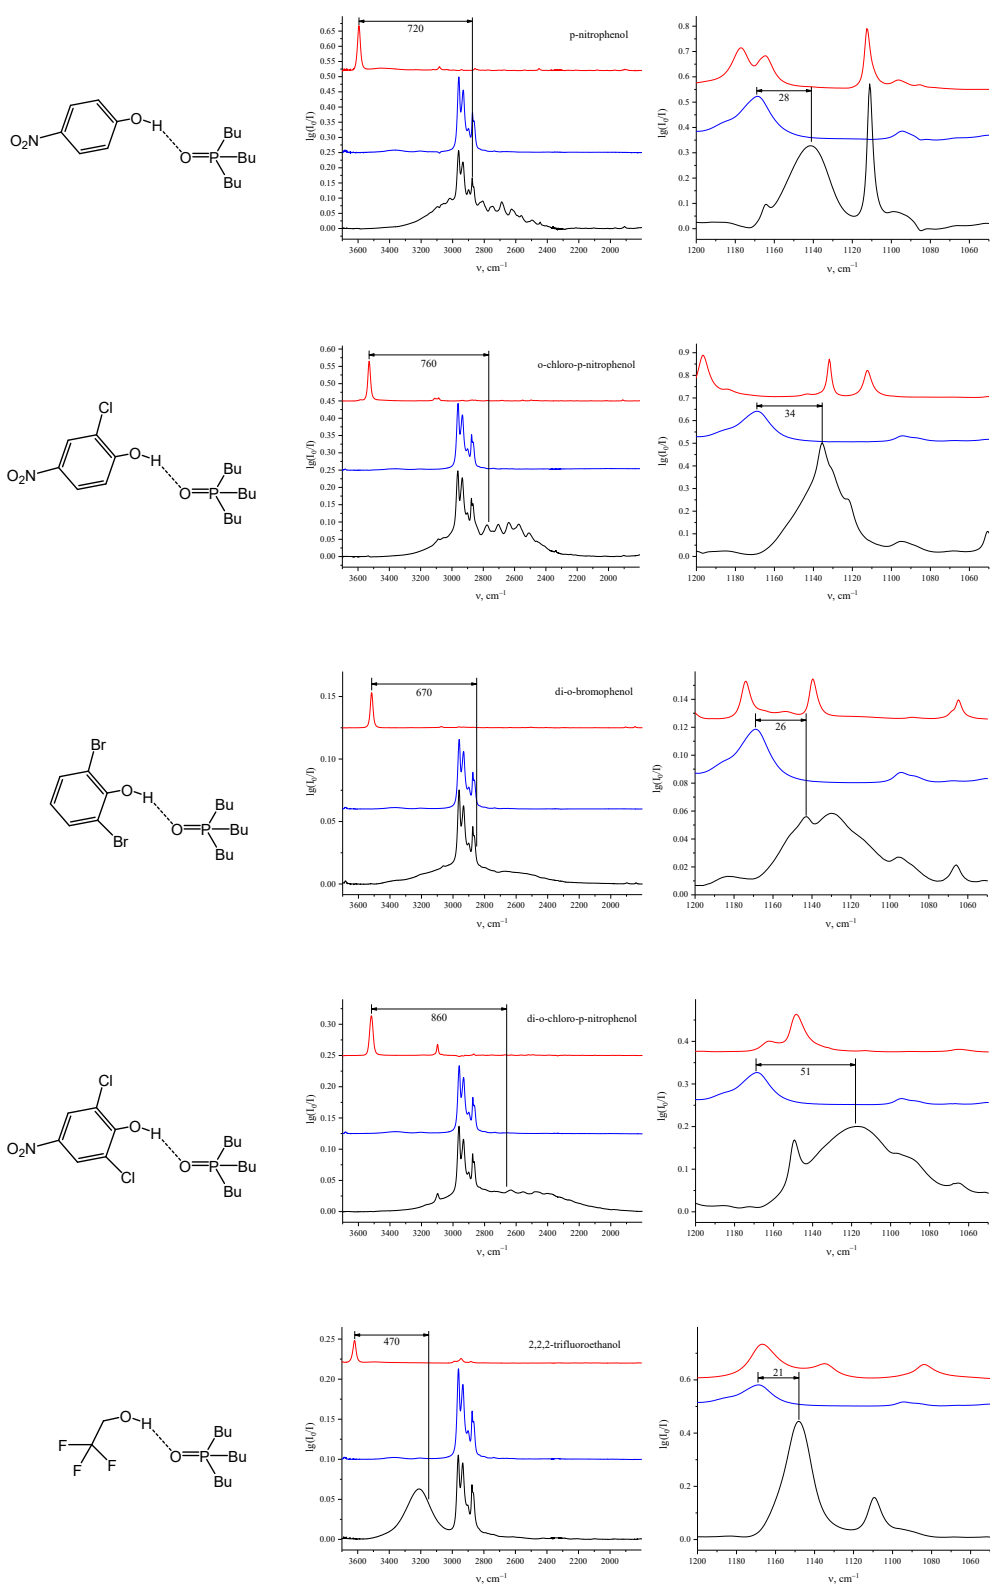

Fig. S5 (continued)

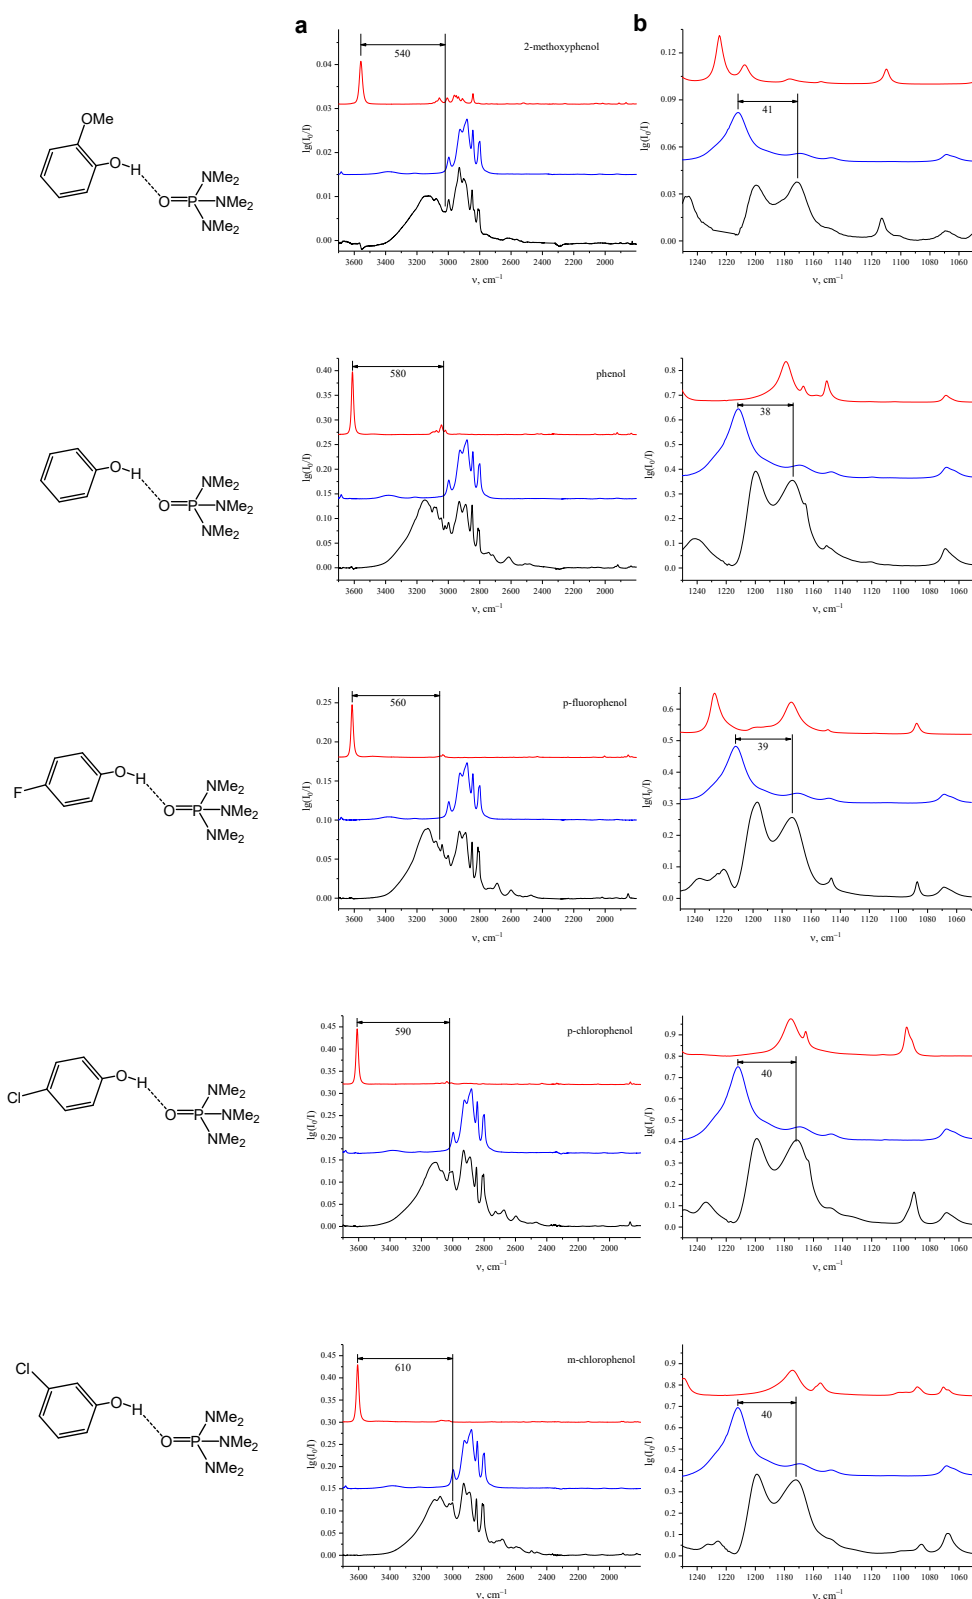

**Fig. S6.** Parts of IR spectra of complexes formed by HMPA and proton donors **1–10** in  $\text{CCl}_4$  solution at room temperature in the regions of (a) OH stretching vibrations (b) P=O stretching vibrations. The spectra of free proton donors (red) free HMPA (blue) and their complexes (black) are shown. Vertical bars indicate locations of OH and P=O vibrational bands for free species and the complexes.



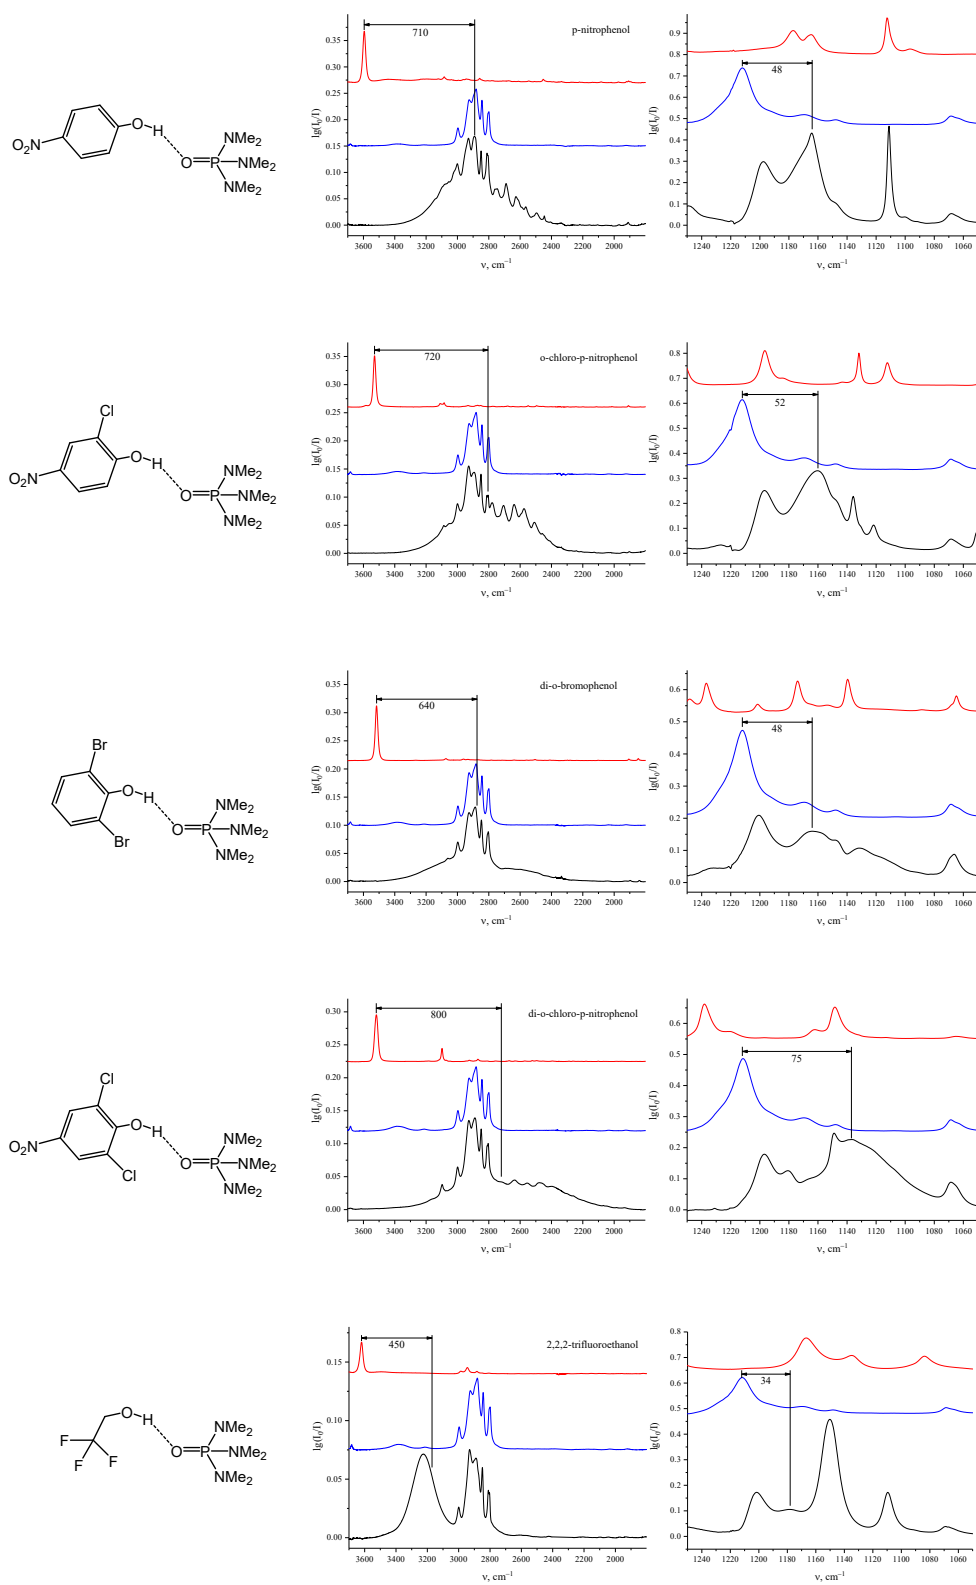

Fig. S6. (Continued)

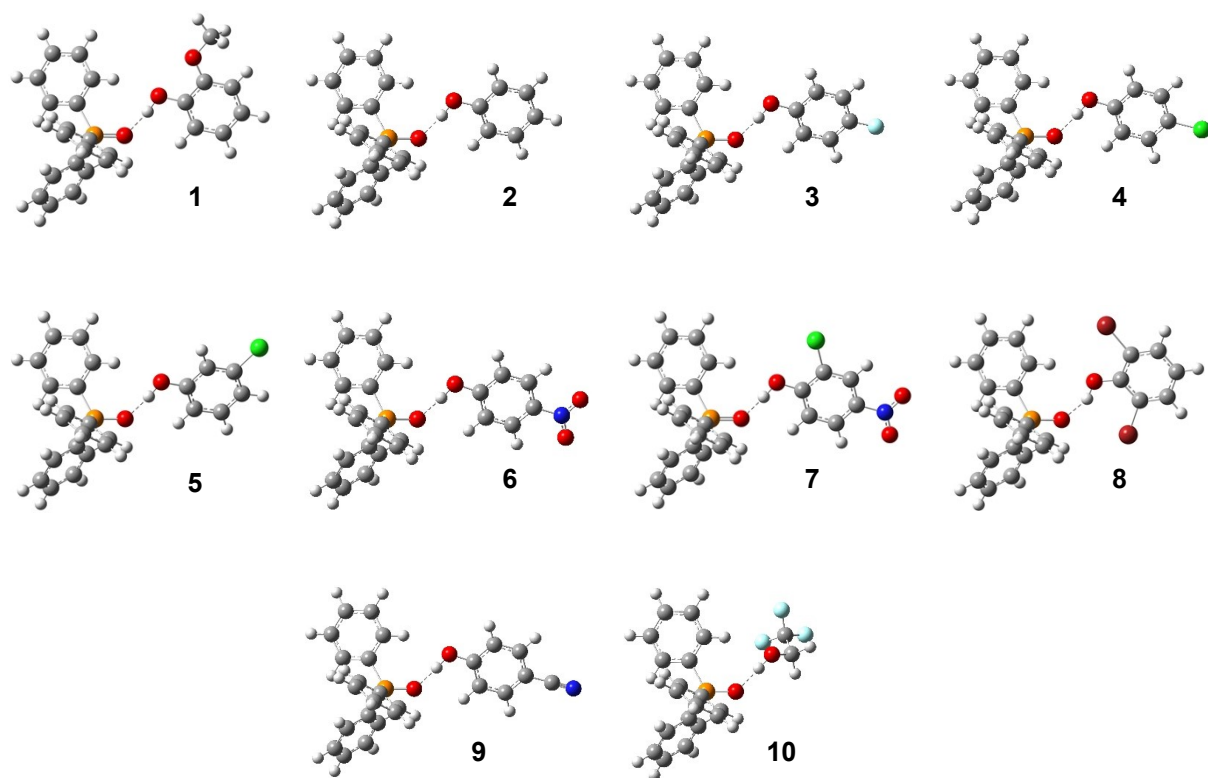

**Fig. S7.** Calculated (B3LYP/aug-cc-pVDZ) optimized geometries of hydrogen-bonded TPPO complexes with proton donors 1–10. Hydrogen bonds are shown in the plane of the figure.

**Table S2.** Calculated (B3LYP/aug-cc-pVDZ) parameters of hydrogen-bonded complexes of TPPO with proton donors 1–10: local electron kinetic,  $G$ , and potential,  $V$ , energy densities (in  $\text{kJ mol}^{-1} \text{Bohr}^{-3}$ ); interatomic distances within the hydrogen bridge,  $r_{\text{O}\cdots\text{O}}$ ,  $r_{\text{OH}}$  and  $r_{\text{H}\cdots\text{O}}$  (in  $\text{\AA}$ ); hydrogen bond angles  $\alpha$  and  $\beta$  (in degrees); the changes of  $^1\text{H}$  and  $^{31}\text{P}$  NMR chemical shifts,  $\Delta\delta\text{H}$  and  $\Delta\delta\text{P}$  (in ppm); the out-of-plane bending frequency,  $\gamma_{\text{O}\cdots\text{H}-\text{O}}$  (in  $\text{cm}^{-1}$ ).

| No. | Proton donor               | $G$   | $V$   | $r_{\text{O}\cdots\text{O}}$ | $r_{\text{OH}}$ | $r_{\text{H}\cdots\text{O}}$ | $\alpha^a$ | $\beta^a$ | $\Delta\delta\text{H}^b$ | $\Delta\delta\text{P}^b$ | $\gamma_{\text{O}\cdots\text{H}-\text{O}}$ |
|-----|----------------------------|-------|-------|------------------------------|-----------------|------------------------------|------------|-----------|--------------------------|--------------------------|--------------------------------------------|
| 1   | 2-methoxyphenol            | 95.5  | 91.7  | 2.680                        | 0.989           | 1.698                        | 125.4      | 171.4     | 7.09                     | 8.99                     | 825.5                                      |
| 2   | phenol                     | 94.5  | 90.3  | 2.685                        | 0.989           | 1.701                        | 126.3      | 173.1     | 6.88                     | 8.64                     | 814.3                                      |
| 3   | 4-fluorophenol             | 97.1  | 93.6  | 2.679                        | 0.990           | 1.692                        | 126.6      | 174.6     | 6.99                     | 9.14                     | 832.6                                      |
| 4   | 4-chlorophenol             | 100.3 | 97.8  | 2.668                        | 0.991           | 1.680                        | 127.3      | 174.9     | 7.15                     | 9.45                     | 842.4                                      |
| 5   | 3-chlorophenol             | 101.0 | 98.7  | 2.666                        | 0.992           | 1.677                        | 126.7      | 174.5     | 7.25                     | 9.34                     | 842.7                                      |
| 6   | 4-nitrophenol              | 113.6 | 116.8 | 2.631                        | 0.998           | 1.634                        | 129.0      | 176.9     | 7.87                     | 10.63                    | 905.1                                      |
| 7   | 2-chloro-4-nitrophenol     | 124.5 | 134.4 | 2.603                        | 1.003           | 1.601                        | 127.8      | 176.5     | 7.26                     | 12.06                    | 923.1                                      |
| 8   | 2,6-dibromophenol          | 89.7  | 85.3  | 2.641                        | 0.994           | 1.717                        | 129.5      | 153.0     | 5.98                     | 8.04                     | 814.3                                      |
| 9   | 2,6-dichloro-4-nitrophenol | 116.2 | 123.2 | 2.581                        | 1.007           | 1.619                        | 129.9      | 158.1     | 7.63                     | 10.04                    | 901.0                                      |
| 10  | 2,2,2-trifluoroethanol     | 97.3  | 93.4  | 2.679                        | 0.988           | 1.692                        | 128.3      | 178.4     | 6.85                     | 8.86                     | 782.4                                      |

<sup>a</sup>  $\alpha$  – the angle POH,  $\beta$  – the angle OHO

<sup>b</sup> Calculated by GIAO method at the same level of theory

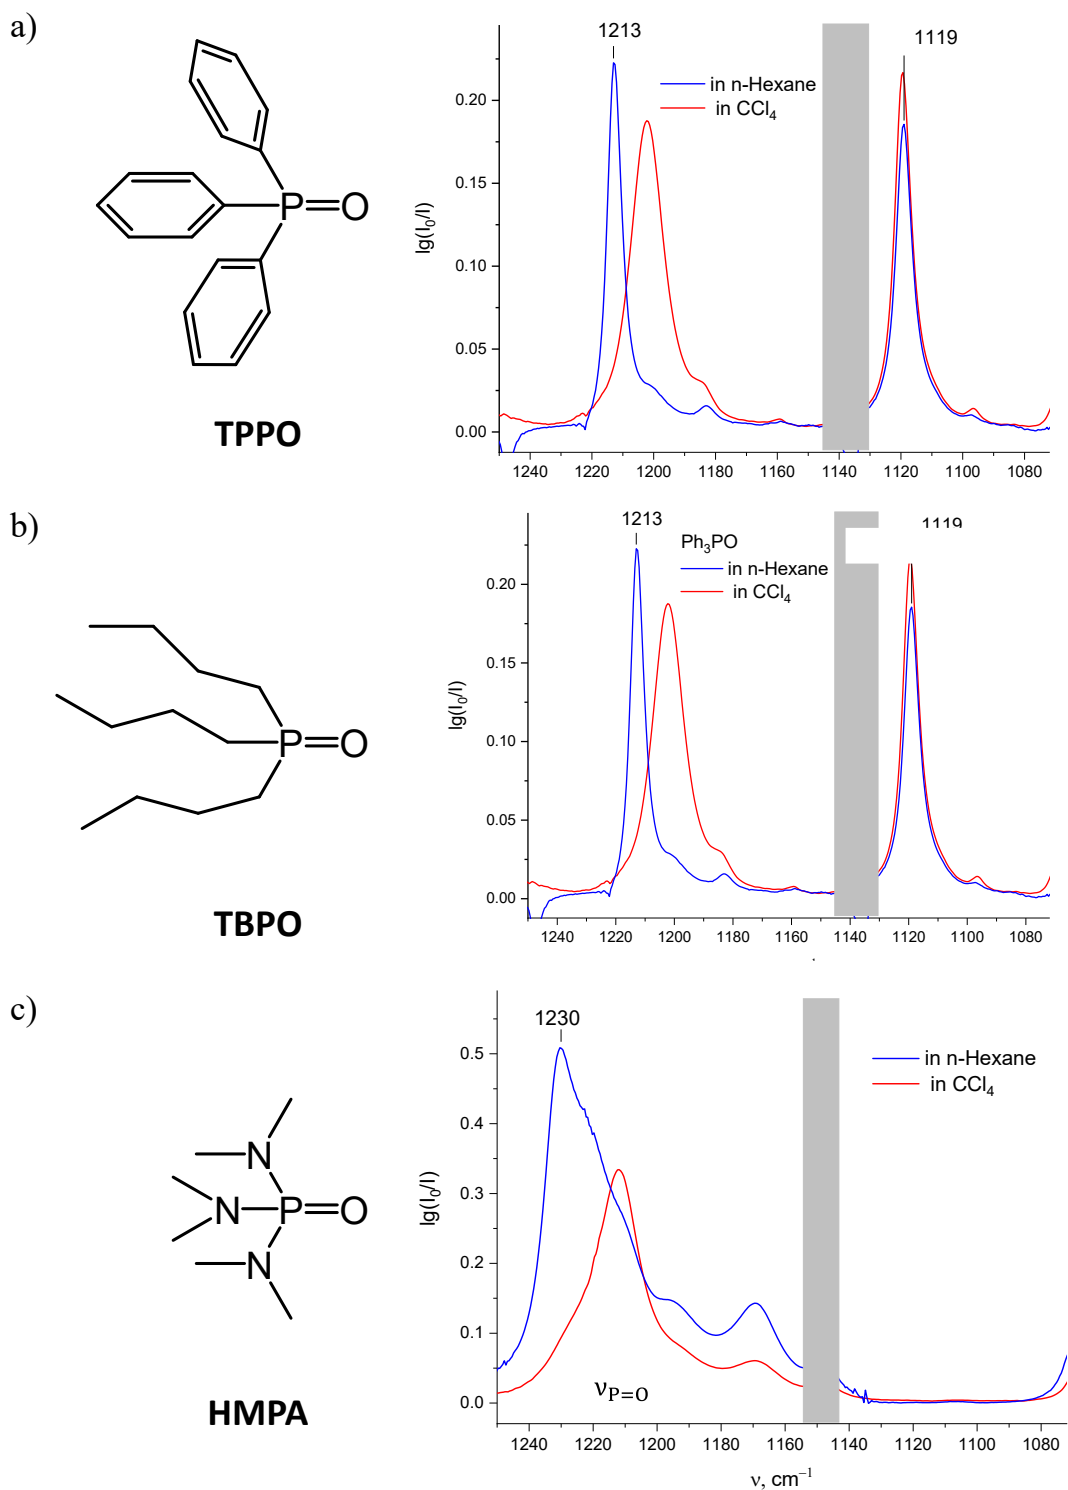

**Fig. S8.** Comparison of IR spectra of (a) TPPO, (b) TBPO and (c) HMPA in solutions in  $\text{CCl}_4$  (red) and *n*-hexane (blue) recorded at concentration values 5.9, 9.6 and 11.7  $\text{mmol L}^{-1}$ , respectively, at room temperature in the range of frequencies from  $1070 \text{ cm}^{-1}$  to  $1250 \text{ cm}^{-1}$ . Gray areas indicate ranges containing *n*-hexane absorption bands. For *n*-hexane solution the  $\text{P}=\text{O}$  vibration band,  $\nu_{\text{P}=\text{O}}$ , is located at  $\sim 1213 \text{ cm}^{-1}$  for free TPPO,  $\sim 1181 \text{ cm}^{-1}$  for free TBPO and  $\sim 1230 \text{ cm}^{-1}$  for free HMPA.

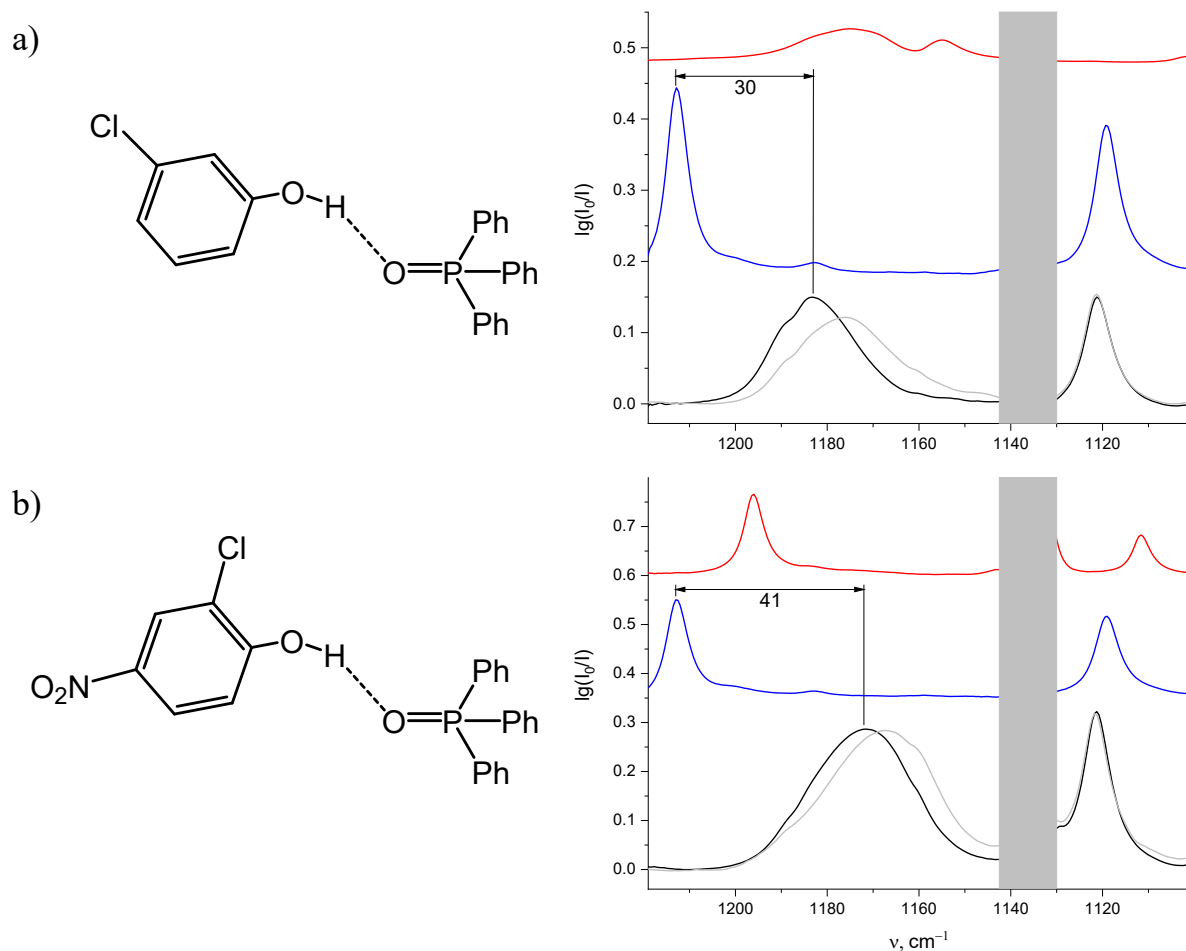

**Fig. S9.** Parts of IR spectra of TPPPO complexes with (a) 3-chlorophenol **5** (b) 2-chloro-4-nitrophenol **7** in *n*-hexane solution at room temperature in the range of frequencies from 1100  $\text{cm}^{-1}$  to 1220  $\text{cm}^{-1}$ . The spectra of free phenols **5** and **7** (red), free TPPPO (blue) and their complexes in *n*-hexane solution (black) are shown. IR spectra of the same complexes in  $\text{CCl}_4$  solution (gray) are shown for comparison. Gray areas indicate ranges containing *n*-hexane absorption bands. For *n*-hexane solution the shift of P=O vibration band upon complexation,  $\Delta\nu_{\text{P=O}}$ , equal to  $\sim 30 \text{ cm}^{-1}$  for complexes with 3-chlorophenol,  $\sim 41 \text{ cm}^{-1}$  for complexes with 2-chloro-4-nitrophenol.

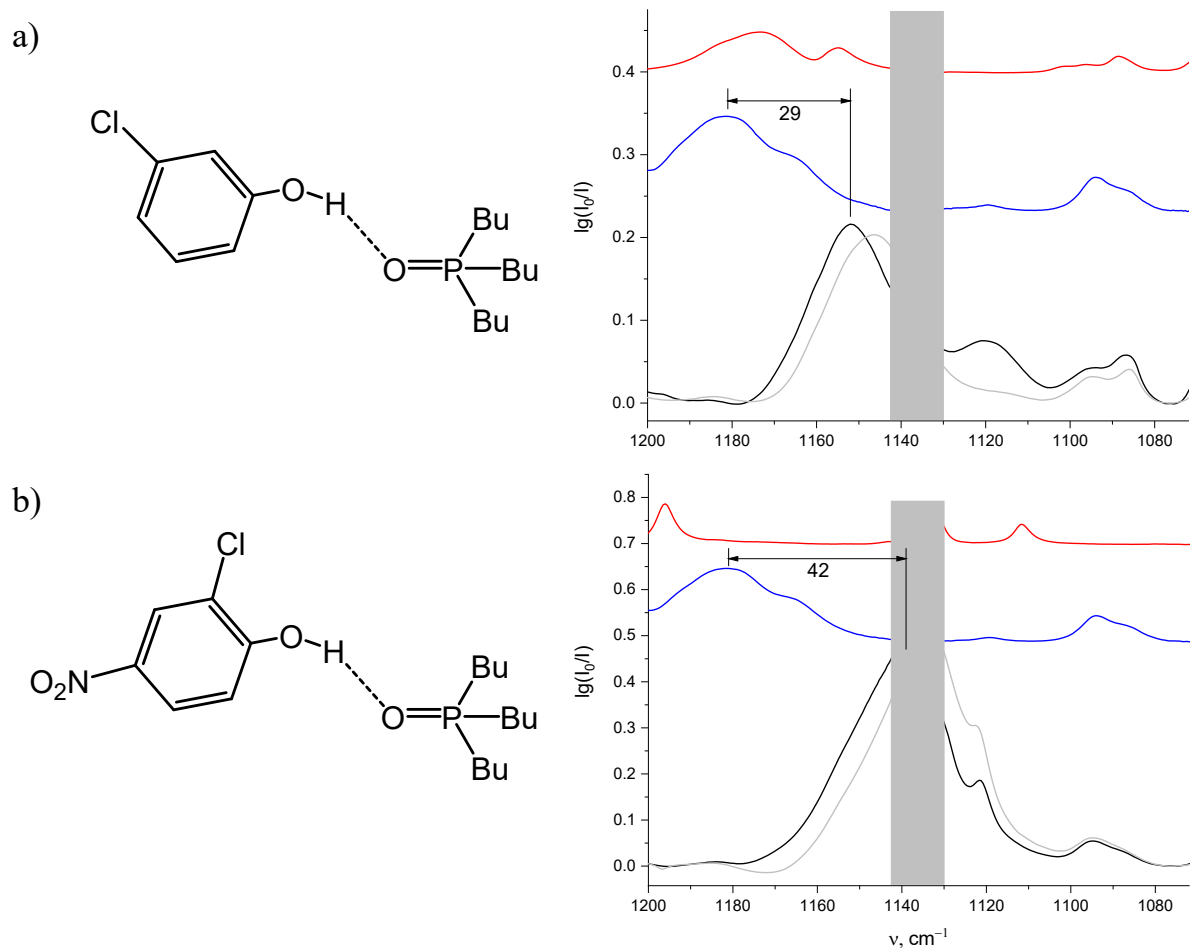

**Fig. S10.** Parts of IR spectra of TBPO complexes with (a) 3-chlorophenol **5** (b) 2-chloro-4-nitrophenol **7** in *n*-hexane solution at room temperature in the range of frequencies from 1070  $\text{cm}^{-1}$  to 1200  $\text{cm}^{-1}$ . The spectra of free phenols **5** and **7** (red), free TBPO (blue) and their complexes in *n*-hexane solution (black) are shown. IR spectra of the same complexes in  $\text{CCl}_4$  solution (gray) are shown for comparison. Gray areas indicate ranges containing *n*-hexane absorption bands. For *n*-hexane solution the shift of P=O vibration band upon complexation,  $\Delta\nu_{\text{P=O}}$ , equal to  $\sim 29 \text{ cm}^{-1}$  for complexes with 3-chlorophenol,  $\sim 42 \text{ cm}^{-1}$  for complexes with 2-chloro-4-nitrophenol.

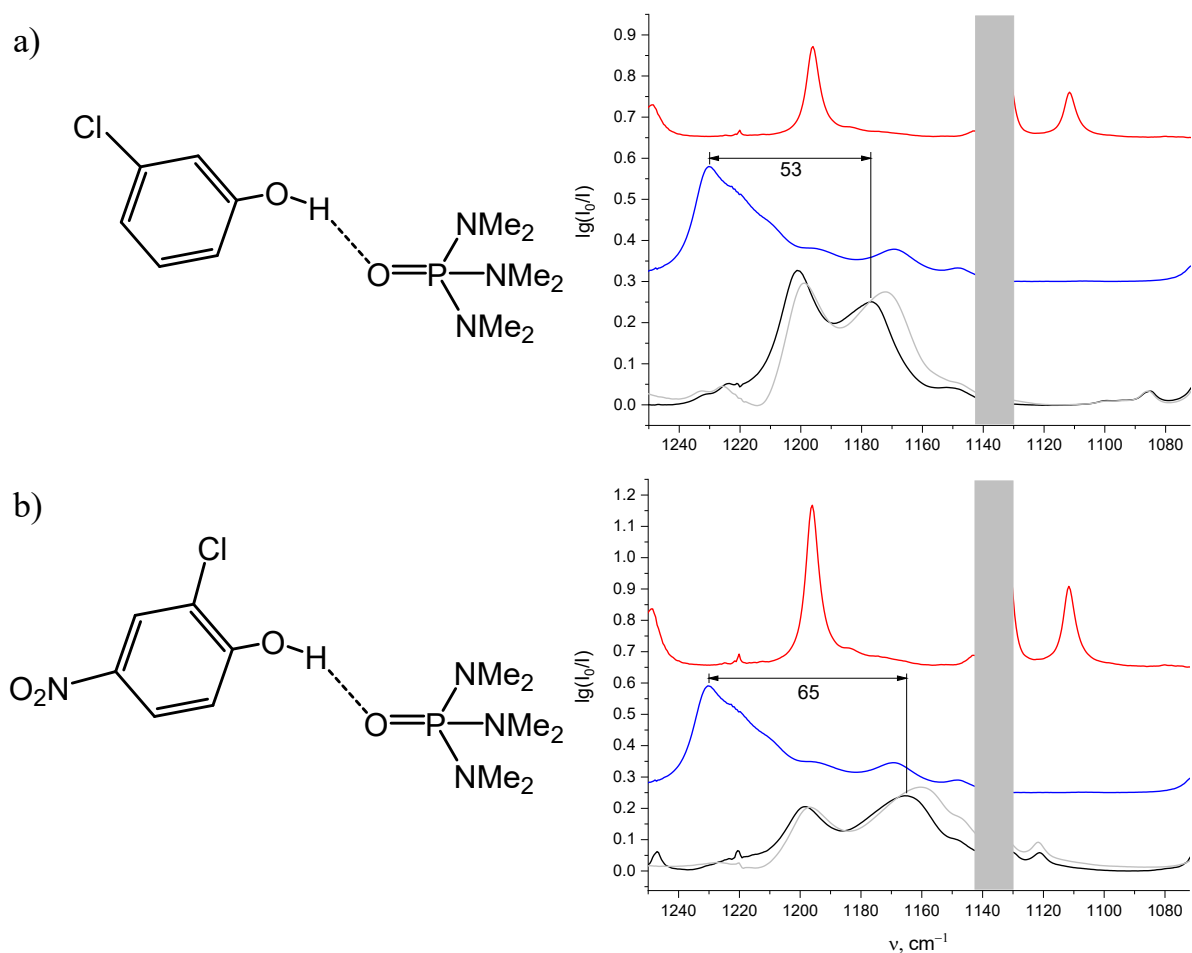

**Fig. S11.** Parts of IR spectra of HMPA complexes with (a) 3-chlorophenol **5** (b) 2-chloro-4-nitrophenol **7** in *n*-hexane solution at room temperature in the range of frequencies from 1070  $\text{cm}^{-1}$  to 1250  $\text{cm}^{-1}$ . The spectra of free phenols **5** and **7** (red), free HMPA (blue) and their complexes in *n*-hexane solution (black) are shown. IR spectra of the same complexes in  $\text{CCl}_4$  solution (gray) are shown for comparison. Gray areas indicate ranges containing *n*-hexane absorption bands. For *n*-hexane solution the shift of P=O vibration band upon complexation,  $\Delta\nu_{\text{P=O}}$ , equal to  $\sim 53 \text{ cm}^{-1}$  for complexes with 3-chlorophenol,  $\sim 65 \text{ cm}^{-1}$  for complexes with 2-chloro-4-nitrophenol.

**Table S3.** The values of coefficients of determination ( $R^2$ ) calculated for fitting functions  $\Delta\nu_{\text{OH}}(\Delta\nu_{\text{P=O}})$  obtained using power functions given by Eqn (1) (without solvent correction) and Eqn (2) (with solvent correction).

| Complexes with | $\Delta\nu_{\text{OH}}(\Delta\nu_{\text{P=O}})$   |                                                    |
|----------------|---------------------------------------------------|----------------------------------------------------|
|                | Without correction for solvent influence, Eqn (1) | With the correction for solvent influence, Eqn (2) |
| TPPO           | 0.91                                              | 0.90                                               |
| TBPO           | 0.85                                              | 0.84                                               |
| HMPA           | 0.82                                              | 0.81                                               |

**Table S4.** The wavenumbers of  $\nu_{OH}$  bands in IR spectra of free proton donors **1–10** in *n*-hexane solution at room temperature. The shifts of bands,  $\Delta\nu$ , upon the change of solvent from *n*-hexane to  $CCl_4$  are given in the last column.

| No.       | Proton donor               | $\nu_{OH}^{in\ hexane}$ , $cm^{-1}$ | $\Delta\nu$ , $cm^{-1}$ |
|-----------|----------------------------|-------------------------------------|-------------------------|
| <b>1</b>  | 2-methoxyphenol            | 3566                                | 9                       |
| <b>2</b>  | phenol                     | 3622                                | 11                      |
| <b>3</b>  | 4-fluorophenol             | 3625                                | 12                      |
| <b>4</b>  | 4-chlorophenol             | 3621                                | 12                      |
| <b>5</b>  | 3-chlorophenol             | 3619                                | 13                      |
| <b>6</b>  | 4-nitrophenol              | 3615                                | 21                      |
| <b>7</b>  | 2-chloro-4-nitrophenol     | 3537                                | 8                       |
| <b>8</b>  | 2,6-dibromophenol          | 3521                                | 5                       |
| <b>9</b>  | 2,6-dichloro-4-nitrophenol | 3529                                | 10                      |
| <b>10</b> | 2,2,2-trifluoroethanol     | 3629                                | 10                      |



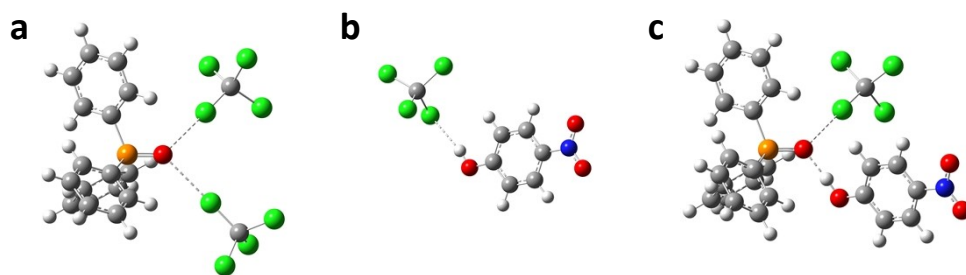

**Fig. S12.** The optimized geometries (B3LYP/aug-cc-pVDZ, gas phase) of (a) isolated TPPO molecule solvated by two  $\text{CCl}_4$  molecules, (b) isolated 4-nitrophenol molecule solvated by one  $\text{CCl}_4$  molecule and (c) 1:1:1 complex formed by TPPO, 4-nitrophenol and  $\text{CCl}_4$ .

**Table S5.** The wavenumbers of OH and P=O stretching vibrations (in  $\text{cm}^{-1}$ ) for free TPPO, 4-nitrophenol and their complexes without or with additional  $\text{CCl}_4$  molecules. The wavenumbers for the complex without  $\text{CCl}_4$  molecules were taken from Table 2.

| Complex                                           | $\nu_{\text{OH}}$ | $\nu_{\text{P=O}}$ |
|---------------------------------------------------|-------------------|--------------------|
| 4-nitrophenol free                                | 3807              | –                  |
| 4-nitrophenol solvated by $\text{CCl}_4$          | 3765              | –                  |
| TPPO free                                         | –                 | 1163.1             |
| TPPO solvated by two $\text{CCl}_4$ molecule      | –                 | 1146.6             |
| TPPO and 4-nitrophenol                            | 3163              | 1135.8             |
| TPPO and 4-nitrophenol solvated by $\text{CCl}_4$ | 3202              | 1131.8             |

An account for one or two explicit  $\text{CCl}_4$  molecules changes the complexation equilibrium reaction from the one shown in Fig. 7a to the one shown in Fig. 7b. As our calculations for TPPO complex with 4-nitrophenol **6** show, interaction with  $\text{CCl}_4$  expectedly decreases the  $\nu_{\text{P=O}}$  of “free” TPPO (from  $1163.1 \text{ cm}^{-1}$  to  $1146.6 \text{ cm}^{-1}$ ) and  $\nu_{\text{OH}}$  of “free” **6** (from  $3807 \text{ cm}^{-1}$  to  $3765 \text{ cm}^{-1}$ ). In the complex, the combined action of hydrogen bond with **6** and halogen bond with  $\text{CCl}_4$  decreases the  $\nu_{\text{P=O}}$  even further (to  $1131.8 \text{ cm}^{-1}$ ), and the  $|\Delta\nu_{\text{P=O}}|$  decreases ( $27.3 \text{ cm}^{-1}$  without  $\text{CCl}_4$ ,  $14.8 \text{ cm}^{-1}$  with  $\text{CCl}_4$ ). In a similar way, the anti-cooperative coupling between hydrogen and halogen bonds decreases  $\nu_{\text{OH}}$  less than if the solvent is absent, so that the resulting  $|\Delta\nu_{\text{OH}}|$  decreases ( $644 \text{ cm}^{-1}$  without  $\text{CCl}_4$ ,  $563 \text{ cm}^{-1}$  with  $\text{CCl}_4$ ).

Assuming that qualitatively similar shifts would be present for other complexes as well, one could expect that the account for explicit solvent molecule would shift all the datapoints in Figure 9 closer to the (0,0) point and the mismatch between the experiment and calculations would only increase. Thus, it seems that minimizing this mismatch is more sophisticated and laborious task than the current study could justify.
